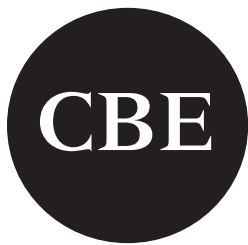

# Life Sciences Education

Published by

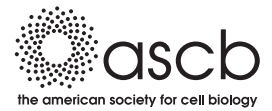

Editorial Partner

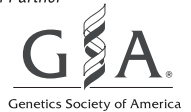

## Editor-in-Chief

**Erin Dolan**  
*University of Texas at Austin*  
edolan@austin.utexas.edu

## Senior Editors

**A. Malcolm Campbell**  
*Davidson College*  
macampbell@davidson.edu

**Sarah Elgin**  
*Washington University in  
St. Louis*  
selgin@biology.wustl.edu

**Jose Herrera**  
*Western New Mexico  
University*  
jose.herrera@wnmu.edu

**William B. Wood**  
*University of Colorado, Boulder*  
wood@colorado.edu

## Editors

**Bruce Alberts**  
*University of California, San Francisco*  
balberts@ucsf.edu

**Deborah Allen**  
*University of Delaware*  
deallen@udel.edu

**Daron Barnard**  
*Worcester State College*  
daron.barnard@worcester.edu

**Janet Batzli**  
*University of Wisconsin-Madison*  
jbatzli@wisc.edu

**Eric Chudler**  
*University of Washington*  
chudler@u.washington.edu

**Clarissa Dirks**  
*Evergreen State College*  
dirks@evergreen.edu

**Diane Ebert-May**  
*Michigan State University*  
ebertmay@msu.edu

**Linnea Fletcher**  
*Austin Community College*  
linneaf@austinctc.edu

**Alison Gammie**  
*Princeton University*  
agammie@princeton.edu

**Graham F. Hatfull**  
*University of Pittsburgh*  
gfh@pitt.edu

**James Hewlett**  
*Finger Lakes Community College*  
hewletja@flcc.edu

**John Jungck**  
*University of Delaware*  
jungck@udel.edu

**Jennifer Knight**  
*University of Colorado, Boulder*  
jennifer.knight@colorado.edu

**Jay Labov**  
*National Research Council*  
jlabov@nas.edu

**Mary Lee Ledbetter**  
*College of the Holy Cross*  
mledbett@holycross.edu

**Kenneth Miller**  
*Brown University*  
kenneth\_miller@brown.edu

**Jennifer Momsen**  
*North Dakota State University*  
Jennifer.Momsen@ndsu.edu

**Nancy Moreno**  
*Baylor College of Medicine*  
nmoreno@bcm.tmc.edu

**Ross Nehm**  
*Stony Brook University*  
ross.nehm@stonybrook.edu

**Diane K. O'Dowd**  
*University of California, Irvine*  
dkodowd@uci.edu

**Nancy Pelaez**  
*Purdue University*  
npelaez@purdue.edu

**Maria Araceli Ruiz-Primo**  
*University of Colorado, Denver*  
Maria.Ruiz-Primo@ucdenver.edu

**Jeff Schinske**  
*De Anza College*  
schinskejeff@fhda.edu

**Hannah Sevian**  
*University of Massachusetts Boston*  
Hannah.Sevian@umb.edu

**Michèle Shuster**  
*New Mexico State University*  
mshuster@nmsu.edu

**Vivian Siegel**  
*The Broad Institute of MIT and Harvard*  
vsiegel@broadinstitute.org

**Michelle Smith**  
*University of Maine*  
michelle.k.smith@maine.edu

**Elisa Stone**  
*University of California, Berkeley*  
emstone@berkeley.edu

**Marshall Sundberg**  
*Emporia State University*  
sundberm@esumail.emporia.edu

**Kimberly Tanner**  
*San Francisco State University*  
kdtanner@sfsu.edu

**Debra Tomanek**  
*University of Arizona*  
dtomanek@u.arizona.edu

**Mary Pat Wenderoth**  
*University of Washington*  
mpw@u.washington.edu

## Publisher

**Stefano Bertuzzi**  
*ASCB Executive Director*

**W. Mark Leader**  
*ASCB Publications Director*

**Thea Clarke**  
*ASCB Director of Communications  
and Education*

CBE—*Life Sciences Education* (ISSN 1931-7913) is published online quarterly (one volume per year) by The American Society for Cell Biology, 8120 Woodmont Avenue, Suite 750, Bethesda, MD 20814-2762, USA; www.ascb.org. The journal, which is accessible at www.lifescied.org and www.pubmedcentral.nih.gov, is supported in part by a grant from the Howard Hughes Medical Institute. "ASCB," "The American Society for Cell Biology," "iBioSeminars," and "Molecular Biology of the Cell" are registered trademarks of The American Society for Cell Biology. "The Cell: An Image Library" is a common law trademark of The American Society for Cell Biology.
