Published by

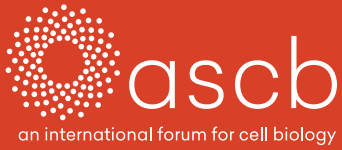

Editorial Partner

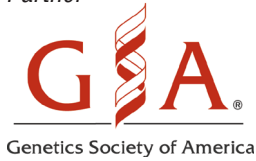

Volume 14, Summer 2015

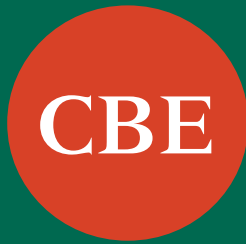

# Life Sciences Education

[www.lifescied.org](http://www.lifescied.org)

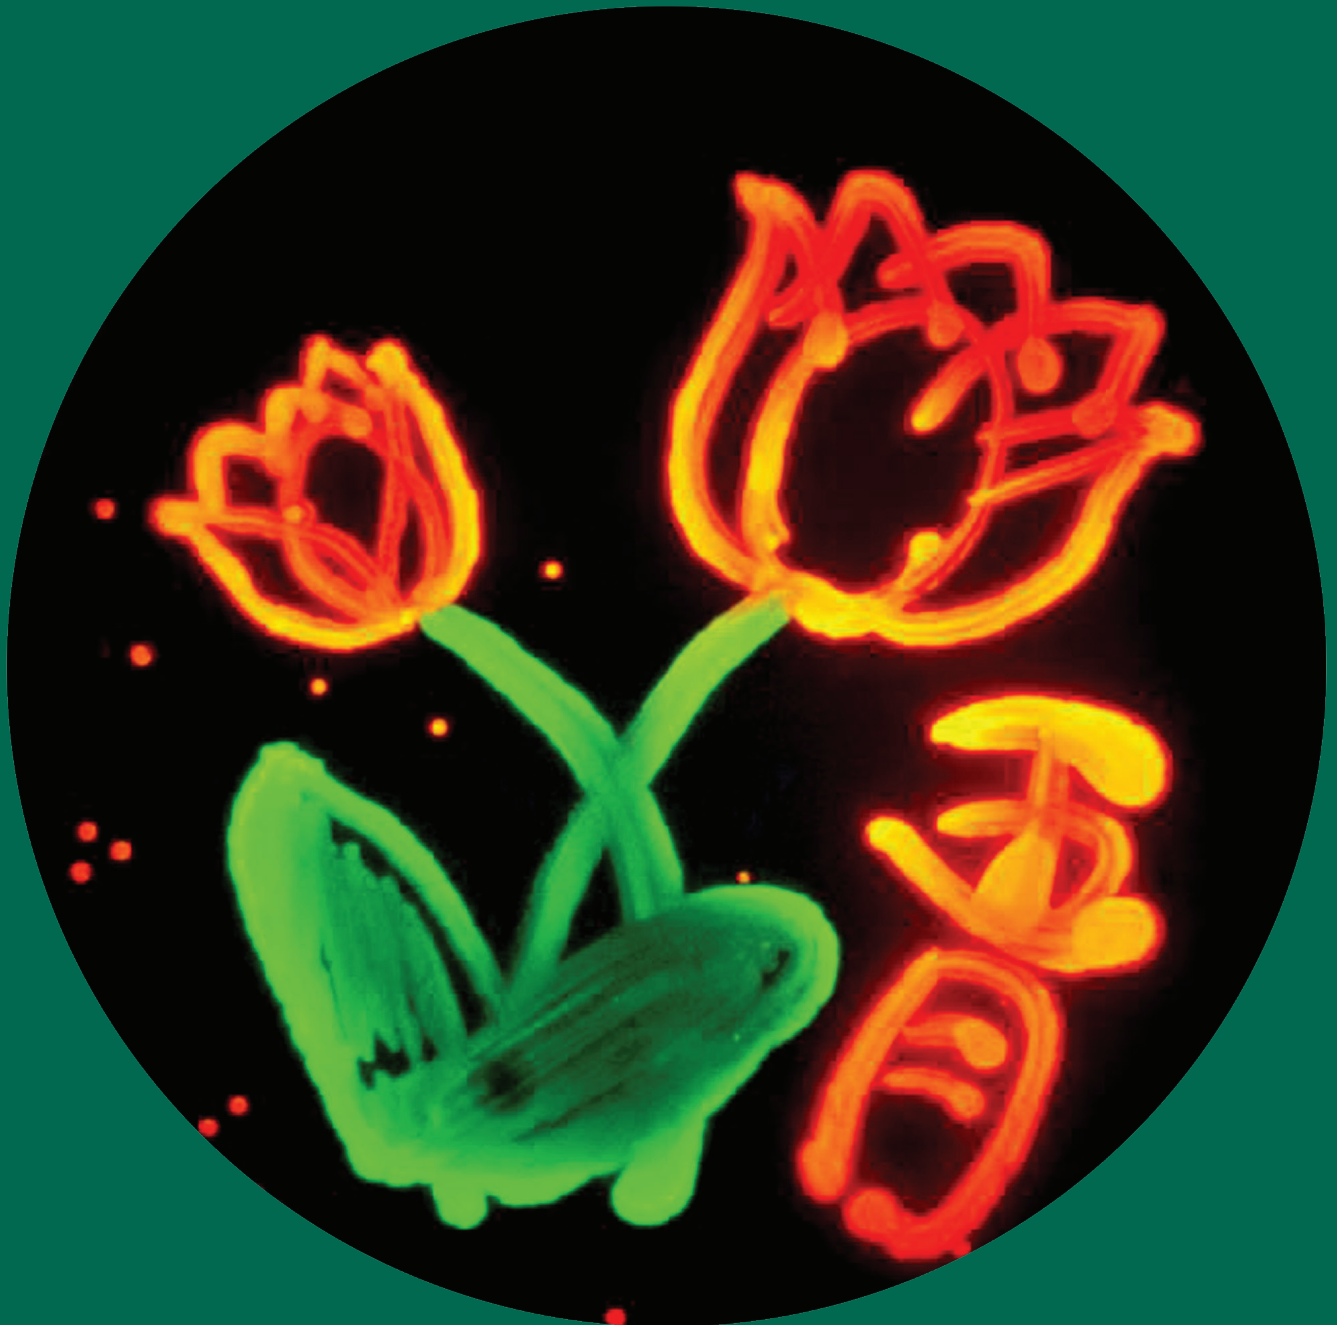

## Questions and Tests
